# Supplementary material for: Identification and characterization of genes involving the early step of Juvenile Hormone pathway in Helicoverpa armigera
Source: PubMed Central journal article supplement (PMC5707400; doi:10.1038/s41598-017-16319-z), 2017-11-29
Supplement: 41598_2017_16319_MOESM1_ESM.pdf [file 41598_2017_16319_MOESM1_ESM.pdf]

Supplementary Information for

**Identification and characterization of genes involving the early step of Juvenile Hormone pathway in *Helicoverpa armigera***

Wanna Zhang<sup>1,2\*</sup>, Long Ma<sup>3\*</sup>, Haijun Xiao<sup>1</sup>, Chen Liu<sup>2</sup>, Lin Chen<sup>2</sup>, Shaolong Wu<sup>4</sup>, Gemei Liang<sup>2</sup>

1 Institute of Entomology, Jiangxi Agricultural University, Nanchang, 330045

2 State Key Laboratory for Biology of Plant Diseases and Insect Pests, Institute of Plant Protection, Chinese Academy of Agricultural Sciences, Beijing 100193, China

3 Jiangxi Key Laboratory of Bioprocess Engineering and Co-Innovation Center for In-vitro Diagnostic Reagents and Devices, College of Life Sciences, Jiangxi Science & Technology Normal University, Nanchang 330013, China

4 China Tobacco Midsouth Agricultural Experimental Station, Changsha 410128, China

\* These authors contributed equally to this work.

Correspondence and requests for materials should be addressed to G.-M. L. (gmliang@ippcaas.cn)

## Supplementary Figures

**Supplementary Figure 1:** Diagram showing the JH biosynthetic pathway (modified from Bellés et al<sup>11</sup> and Noriega et al<sup>10</sup>). The mevalonate pathway is presented in the dashed box. Precursors are in bold and connected by arrows. Enzymes are in italics.

**Supplementary Figure 2:** Phylogenetic analysis of prenyltransferases from selected insects. The protein names and accession numbers used in this analysis are as follows:

AgFpps: *Anopheles gambiae* (EAA04004); DaFpps: *Dendroctonus armandi* (ALF44684.1); TcFpps: *Tribolium castaneum* (NP\_001164089.1); EgFpps: *Epicauta gorhami* (AHH34857.1); DmFpps: *Drosophila melanogaster* (NP\_477380); DbFpps: *Drosophila busckii* (XP\_017837938.1); HlFpps: *Habropoda laboriosa* (KOC62899.1); MpFpps1: *Myzus persicae* (ACA48701.1); MpFpps2: *Myzus persicae* (ABY19313.1); BmFpps1: *Bombyx mori* (BAF62113.1); BmFpps2: *Bombyx mori* (NP\_001093301.1); BmFpps3: *Bombyx mori* (NP\_001093302.1); MuFpps: *Mythimna unipuncta* (AAY33487.1); ObFpps: *Operophtera brumata* (KOB70829.1); CfFpps: *Choristoneura fumiferana* (AAY33486); PmFpps: *Papilio machaon* (KPJ18340.1); PxFpps: *Papilio xuthus* (KPJ05696.1).

**Supplementary Figure 3:** The expression levels among *HaFpps* genes in different tissues. He: heads; Ep: epidermis; Fb: fat body; Mg: midgut; Mt: malpighian tubules; Pm: peritrophic matrix. The bars represent the average ( $\pm$ SE) of biological repeats.

**Supplementary Figure 4:** Subcellular localization of HaFpps4-GFP in insect cells. The images were taken at 24 h post-transfection with the plasmid pHaFpps4-GFP. I, II and III represented three detected types.

**Supplementary Figure 5:** The full-length gels for each gene presented in Figure 2.

**Supplementary Figure 6:** The specificity of the qPCR primers

**Supplementary Figure 7:** Standard curve of JH-III pure chemical

**Supplementary Figure 8:** The chromatograph of JH-III pure chemical (100 ng/  $\mu$  l) and sample (A standard, B sample)

### **Supplementary Tables**

**Supplementary Table 1:** Enzyme-encoding genes in JH biosynthetic pathway in *H. armigera*

**Supplementary Table 2:** Primers used for the genomic sequence analysis.

### **Supplementary sequences**

**Data set 1:** Sequences of genes identified in our study

Supplementary Figure 1

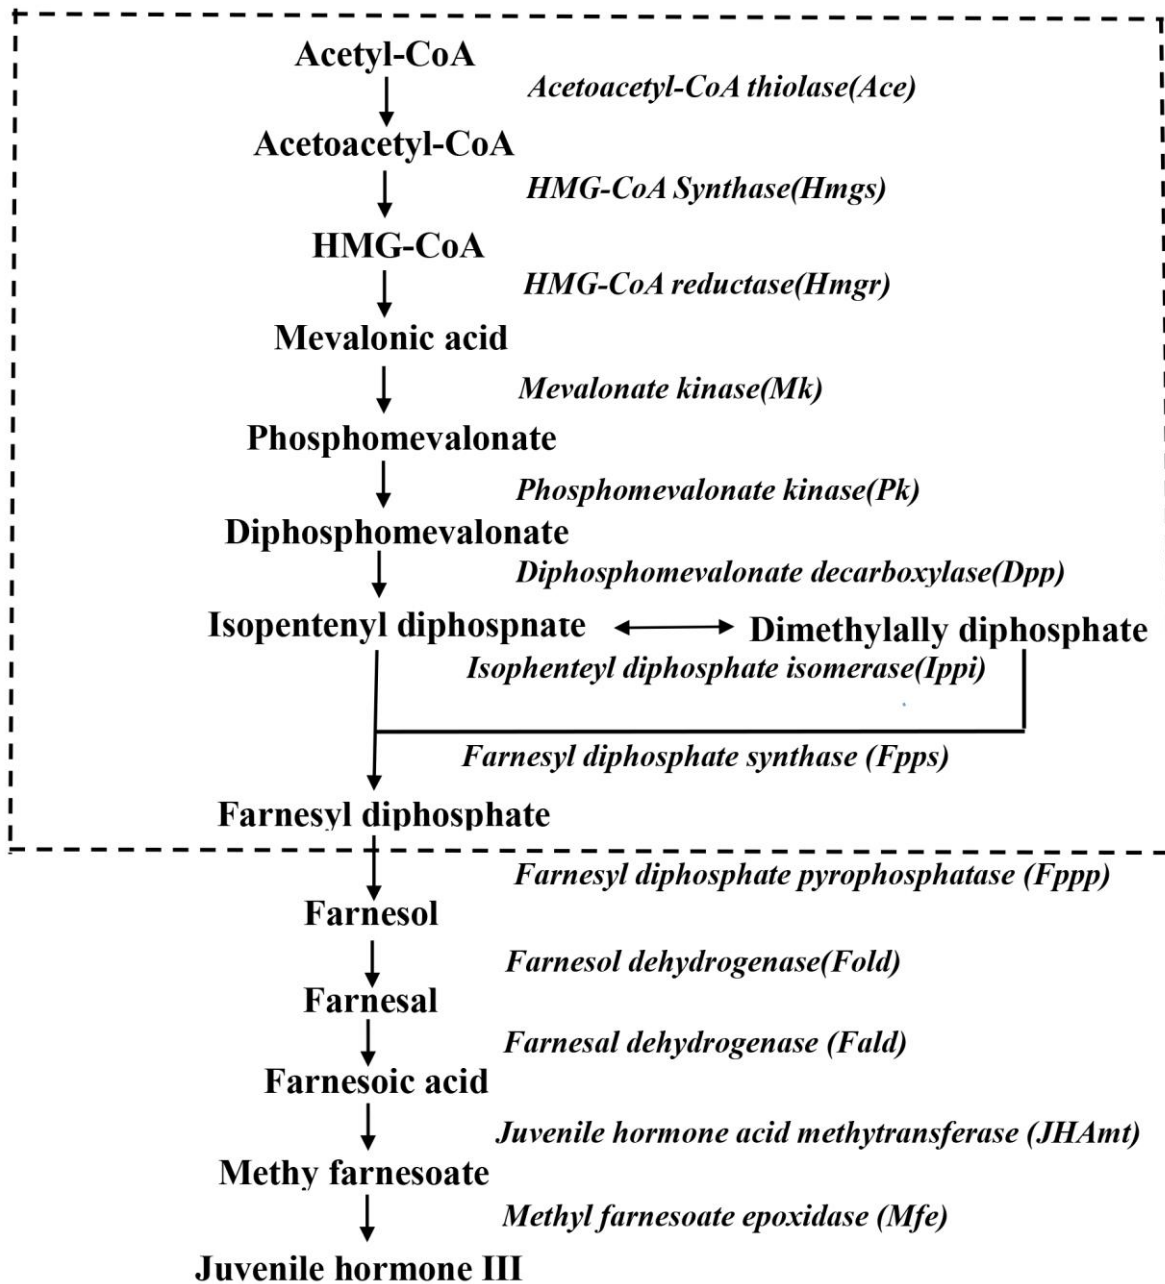

## Supplementary Figure 2

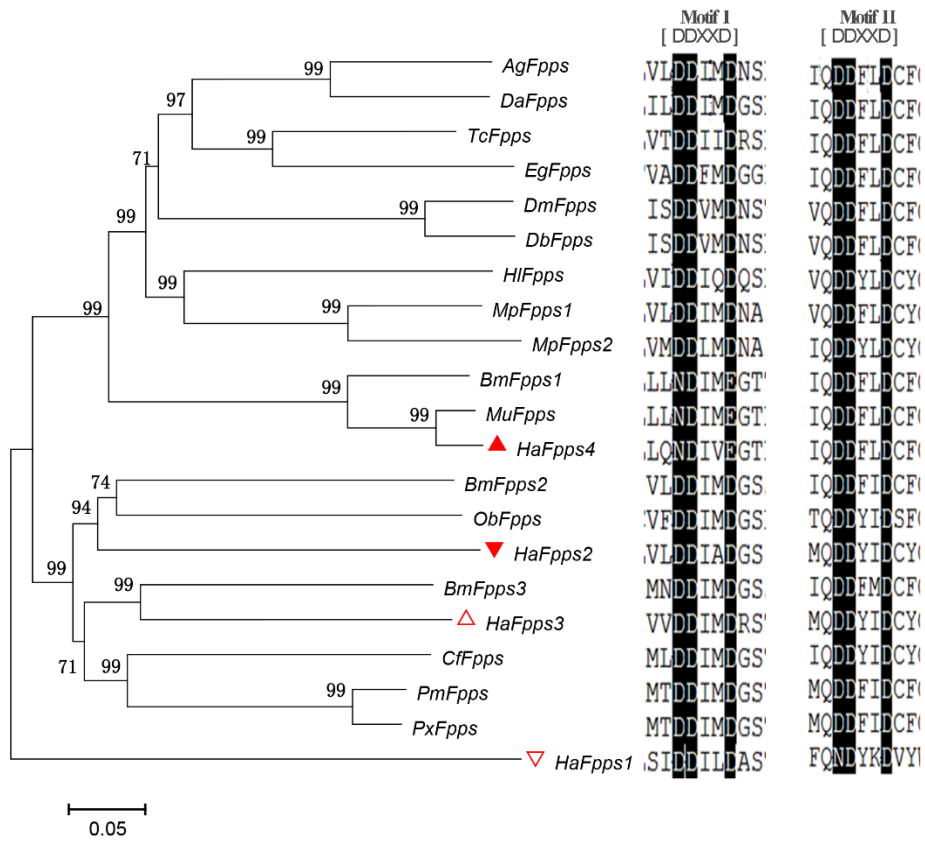

### Supplementary Figure 3

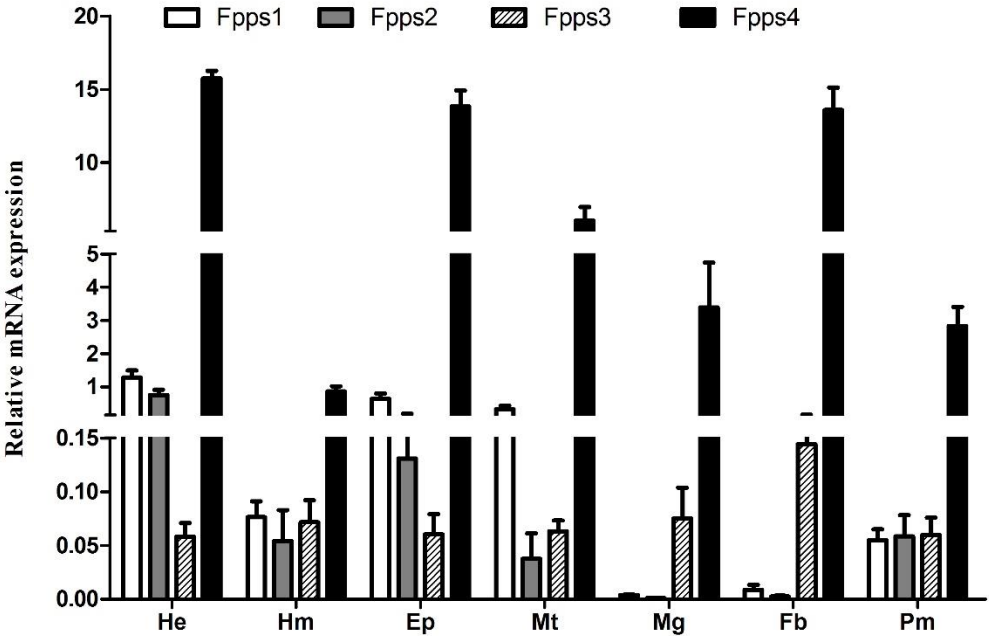

## Supplementary Figure 4

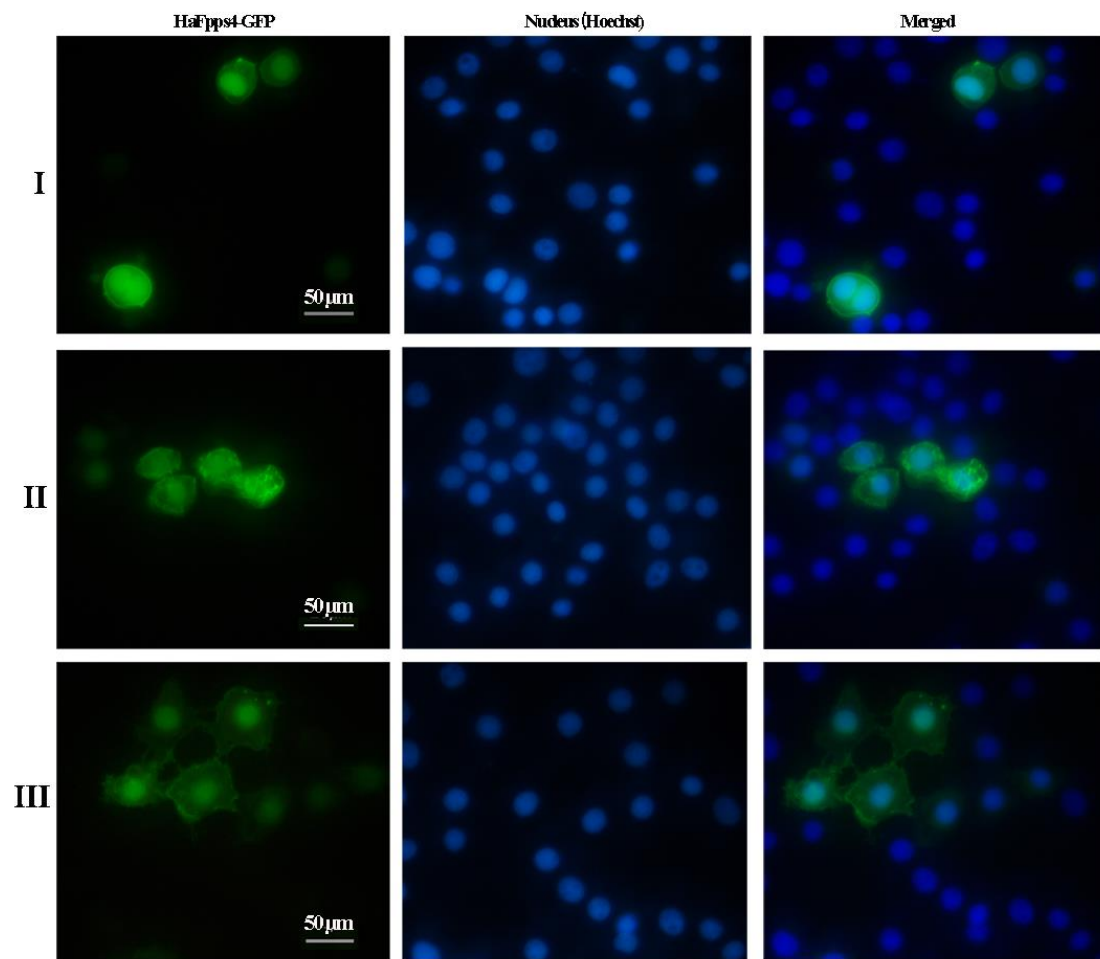

## Supplementary Figure 5

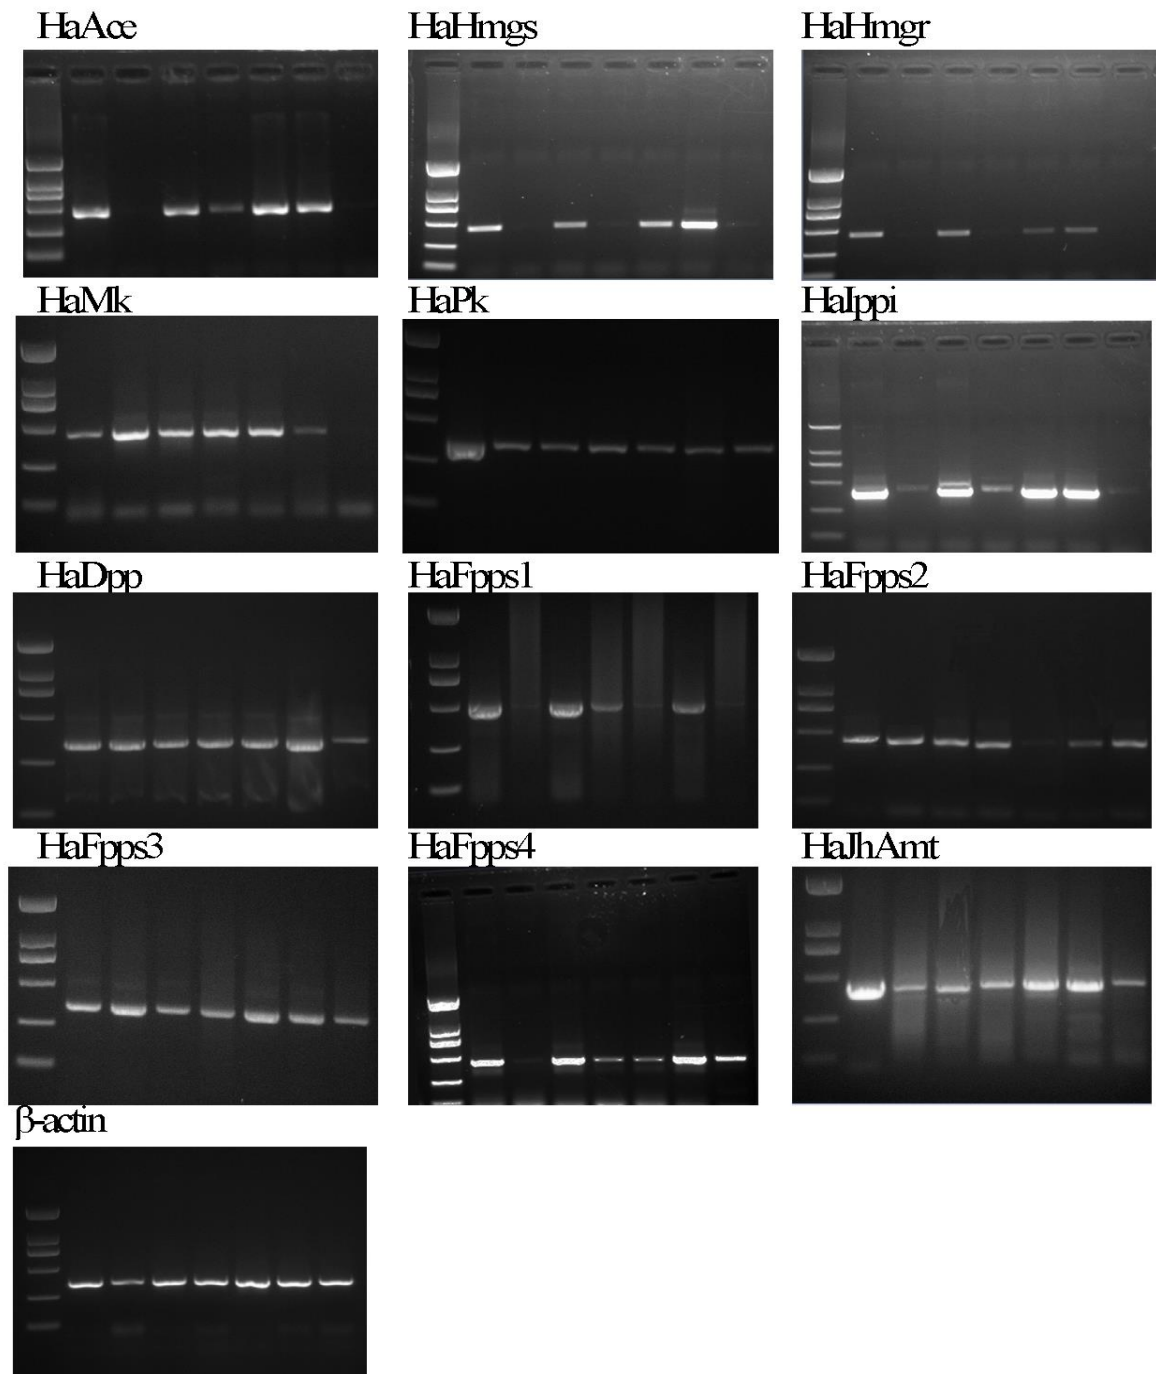



# Supplementary Figure 6

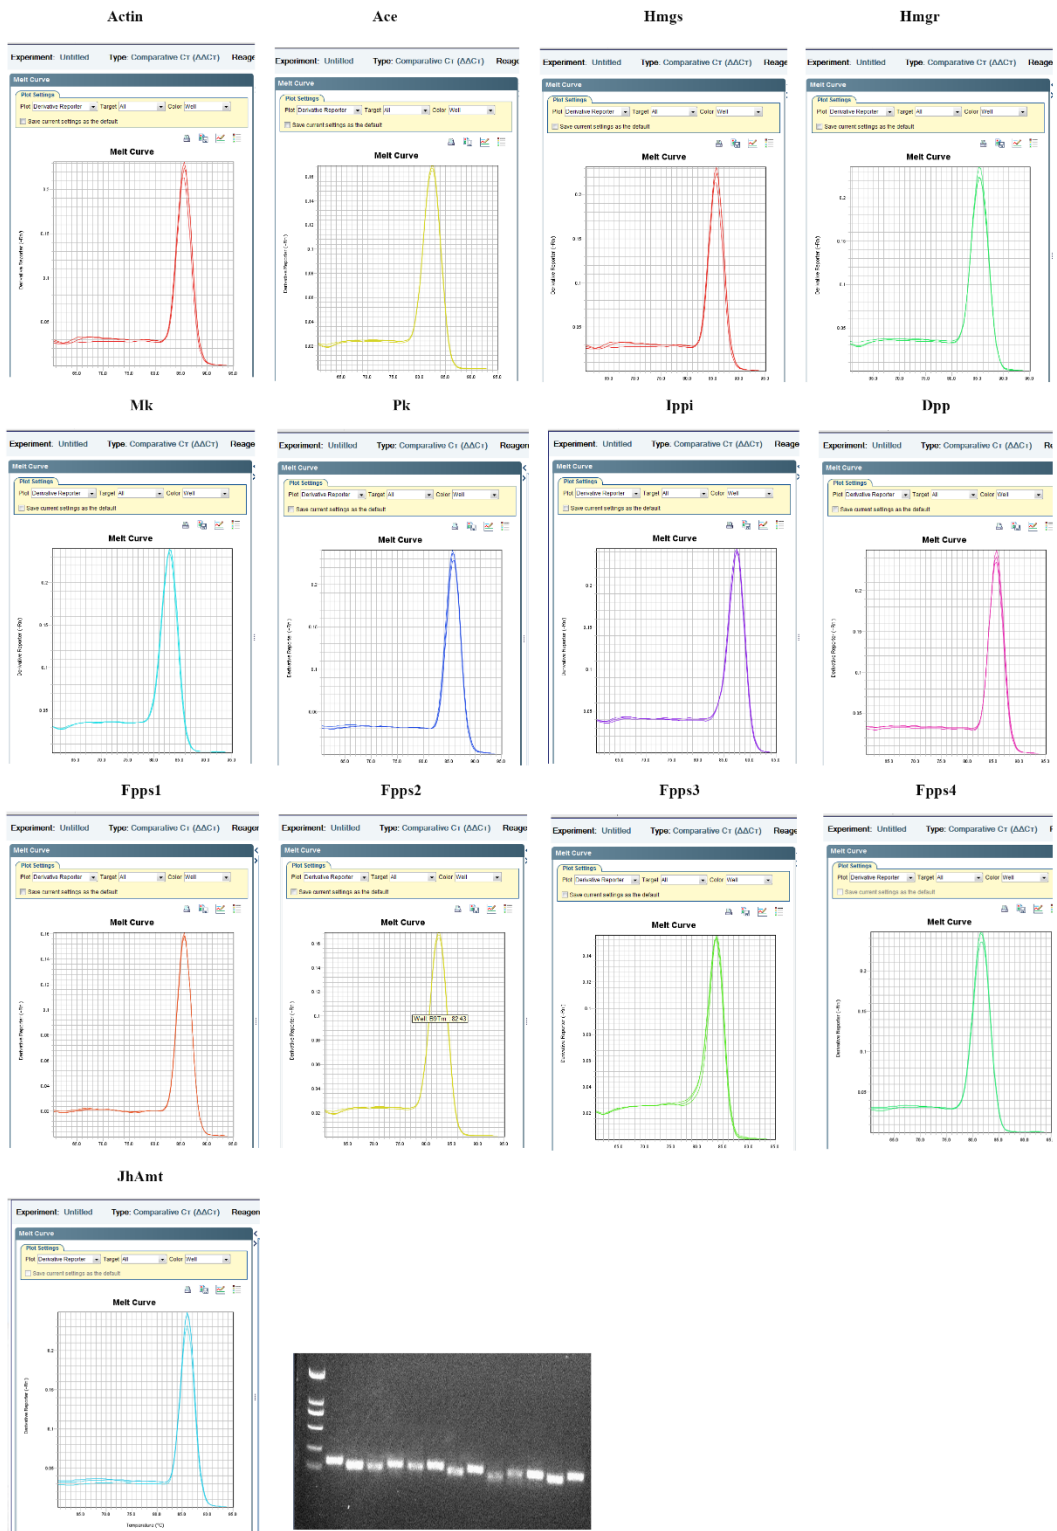

Supplementary Figure 7

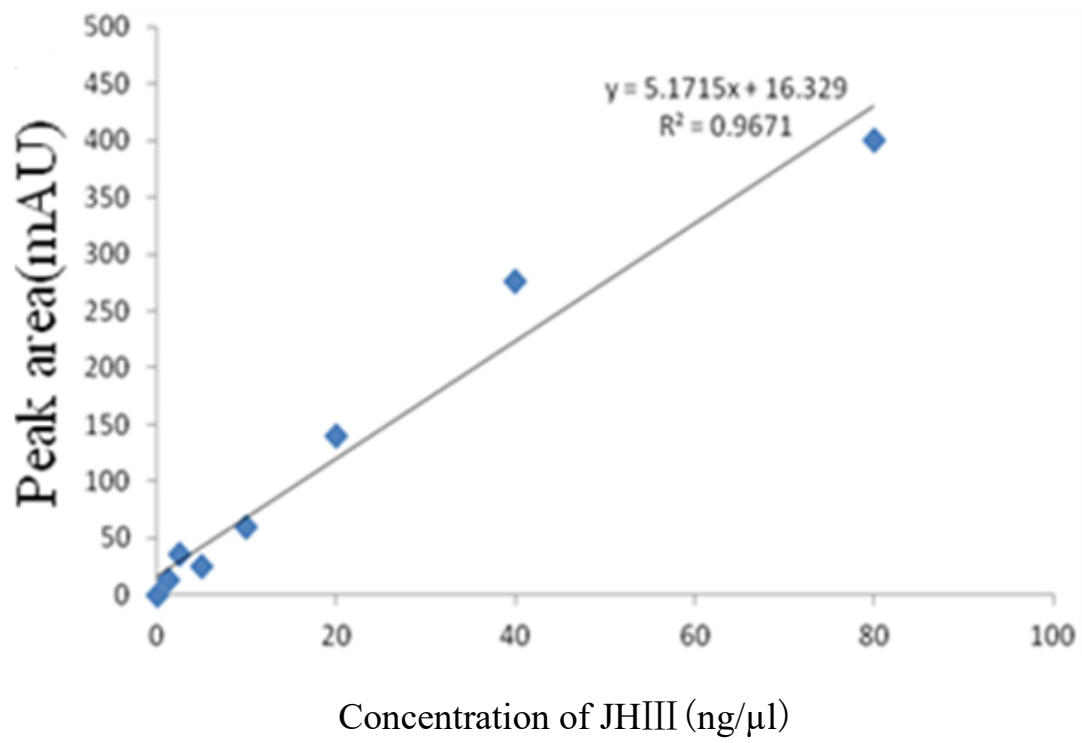

# Supplementary Figure 8

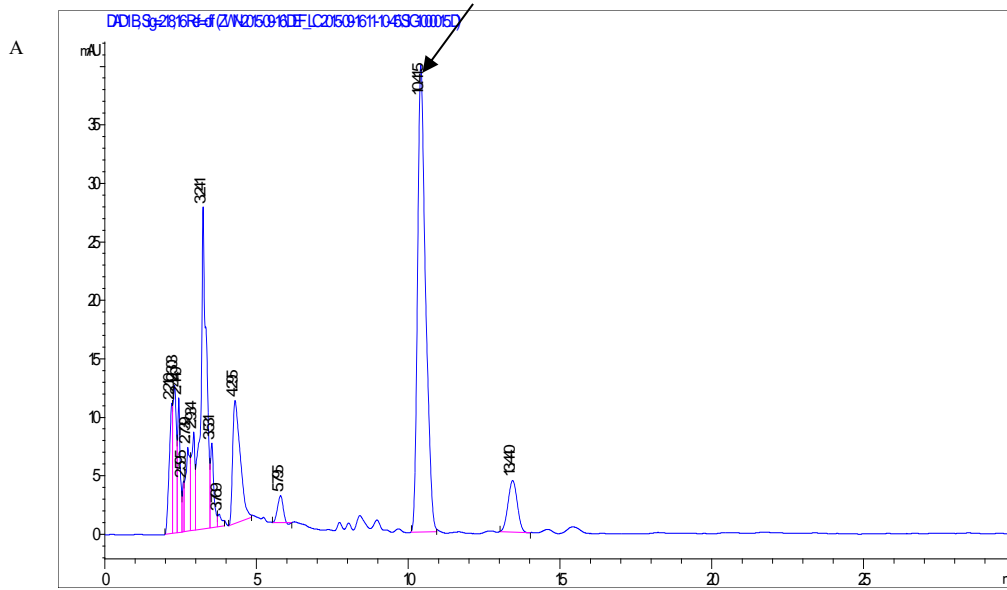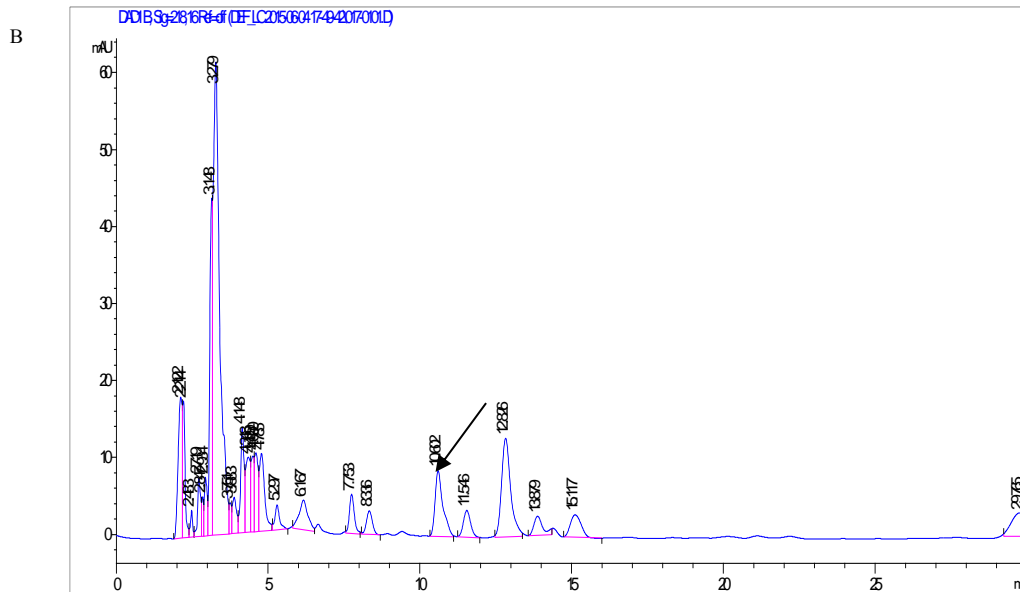

## Supplementary Table 1

| Gene         | Accession number | ORF(bp) | Peptide(aa) | Function                                                                            | Identity | E-value            |
|--------------|------------------|---------|-------------|-------------------------------------------------------------------------------------|----------|--------------------|
| <i>HaAce</i> | KY71766          | 1272    | 423         | catalyze 2 molecules of Acetyl-CoA to form acetoacetyl-CoA                          | 81%      | 0.0                |
| Hmgs         | KY71767          | 1371    | 456         | catalyze Acetoacetyl CoA+acetyl-CoA to form 3-hydroxy-3-methylglutaryl CoA, HMG-CoA | 87%      | 0.0                |
| HaMk         | KY71768          | 1242    | 413         | Phosphorylates mevalonate                                                           | 83%      | 0.0                |
| HaPk         | KY71769          | 558     | 185         | Phosphorylates phosphomevalonate                                                    | 75%      | 2e <sup>-87</sup>  |
| HaDpp        | KJ951986         | 1161    | 386         | catalyze decarboxylation of diphosphomevalonate to form Isoamyl enol pyrophosphate  | 75%      | 0.0                |
| HaIppi       | KJ951988.1       | 759     | 252         | isomerization of IPP to DMAPP                                                       | 86%      | 4e <sup>-166</sup> |
| HaFpps1      | KY71770          | 1131    | 376         | sequential condensation of IPP with DMAPP and then GPP to form FPP                  | 39%      | 3e <sup>-87</sup>  |
| HaFpps2      | KY71771          | 1164    | 387         |                                                                                     | 51%      | 1e <sup>-135</sup> |
| HaFpps3      | KY71772          | 1155    | 384         |                                                                                     | 57%      | 3e <sup>-165</sup> |
| HaFpps4      | KY71773          | 1284    | 427         |                                                                                     | 94%      | 0.0                |

## Supplementary Table 2

| Name of Primers | Forward Sequences (5'-3')   | Reverse Sequences (5'-3') |
|-----------------|-----------------------------|---------------------------|
| Ace-1           | TTTTTTTTGAAAGGCAATAGA       | TATTCTCAGCACAGTTACCCAT    |
| Ace-2           | TTTTTTTTGAAAGGCAATAGA       | CCACCATTACAGACGGCA        |
| Hmgr            | ATGAAAGTCTGGGGAGCT          | TAAATGTCTGCTGAGCTGCAAAC   |
| Hmgs            | ATGGGCGGAAGAGTTGA           | TCAAACITTCCTTGCATAA       |
| Ippi-1          | TCATTCTTTGTTGGGCTTTAC       | GCAGCACTTCACCATCATCTC     |
| Ippi-2          | CAACTTCGTGGGAAGTCTGCTA      | TGAGACGATGAAGGTTGTCCC     |
| Dpp             | TCAAAGTAGTTTAGTAAATTATCGCTG | TTCTAAGAATATAAGATTTTCAT   |
| Mk-1            | CGAAAAGACTCTCACGGTT         | TAATGATGTGTAGGAAGTCTGCTG  |
| Mk-2            | GTGGAGCCAACGATACGGAT        | ATGCTGCCACCTTCACGA        |
| Mk-3            | TCGCTCATAACAGCCACGC         | TCAATCTCACACTTGCCACTG     |
| Mk-4            | TGAGATTGATAGTGAAGCGGA       | CCGAGAGCAGACAGTGGTT       |
| Mk-5            | CCACTGTCTGCTCTCGG           | GCTCACGATTCACTCACCCAT     |
| Pk              | TTGCTATTCAGCGGTAAGAGA       | ATCATAAACCAGACAGCAACC     |
| Fpps1-1         | ATGGCCCTTTTGCTCCGTAA        | GCAGTCATTAGTCGCCGAAGTA    |
| Fpps1-2         | TACTTCGGCGACTAATGACTGC      | TTAATAATCTCTCAGTCGGCAGC   |
| Fpps2-1         | TGCTGTTGGGAAAAGGATTAC       | CACTATAAAGTCTCTGAAAGGT    |
| Fpps2-2         | ACCTTTCAGAGACTTTATAGTG      | TCATGTTCTTACCGCCGATTA     |
| Fpps2-3         | TAATCGGCGGTAAGAACATGA       | CTTTATTCGTTCTATGTGTGCC    |
| Fpps3-1         | AGAAAGTGAGCACGTAGCTAATATT   | CTGGCAGAGCATCGTGAAA       |
| Fpps3-2         | AACTCCCTGAAGTGGGCAAT        | AAGTCCAAGTGTTGCCCCAT      |
| Fpps3-3         | ATGGGGCAACACTTGGACTT        | GTGACTGATTCGTGCGCCGTA     |
| Fpps3-4         | ATGGGGCAACACTTGGACTT        | GTAGGAGCGGTTTCAGAGGG      |
| Fpps4-1         | GCGAACAGACGCTACACCTA        | GTAGCCATCGGCATTTCT        |
| Fpps4-2         | ACGCAGGAAATGCCGATG          | TGTAAGCCAGCACTGTTCGC      |
| Fpps4-3         | ACGCAGGAAATGCCGATG          | AGACCGACTTCTGGGTGCTT      |
| Fpps4-4         | CACAGTTCACACTCACCAG         | GAACAGGGTAAGGTCGGGCT      |
| Fpps4-5         | CACAGTTCACACTCACCAG         | CTGTAAGGCGACGACTGCGA      |

Data Set 1

>Helicoverpa armigera Acetyl-CoA thiolase

ATGTTTTTTTTGAAAGGCAATAGAATTATTACCATCAAAATGCGGCCAGCATATAATAAGCTTTATAAAG  
CGATGGCTGCGTATTCTTCAAAACTTTCCCTGAACGATGTGGTGATCGCGTCCGCTGTGAGGACTCCA  
ATTGGCTCCTTTAAGGGTAGCCTGTTCGAGCCTTTCAGCTACCGAACTTGGAGGTGTCGCCGTTAAAGC  
AGCAGTTGAAAGAGCCGGCATTCTTGAGGAAGAAGTTAAAGAGGTATACATGGGAAATGTCTGTTCT  
GCTGCTTTAGACCAGGCTCCTGCGAGGCAAGCTACCATTTTCGGAGGTCTTCTAAAAGCACAATCTG  
CACAACGTGTTAATAAAGTTTGTTTCATCTGGCATGAAGGCCATCGTATTGGCCACGCAAGGTTTGCAA  
CTGGAACCTCAAGATGTGATATTAGCTGGAGGAATGGAATCTATGTCAAACGTGCCTTACTATTTGAAGA  
GGGGTGATACACCATATGGAGGTGTTTCAGTTGAATGATGGCATTTTGTATAATGGCTTGACTGATGTTT  
ATAACAAAATCCATATGGGTAACGTGCTGAGAATACAGCAAAGAACTGAACATCTCAAGGAAGGA  
ACAAGACGACTATGCTGTTTCAAGTTACAAGAGAAGCGCTACAGCATATGAAAATAAGACTTTTGCTG  
ATGAGCTGGTACCAGTACCGGTGCCCCAGAAGAGAGGTGCTGCCCCAGTTATCTTTGCAGAAGATGA  
GGAGTACAAGAAGATCAACTTTGATAAATTCACCTCATTGGCAACTGTGTTCCAAAAGGAGAATGGA  
ACGGTGACAGCTGGTAATGCCTCAACATTGAATGATGGTGCTGCAGCCATGGTCCTGATGACTGCTGA  
TGCTGCTCAAAGATTGAATGTTAAGCCCCTGGCTCGTGTATTGGATATGCTGATGGGGAATGTGACCC  
TATTGACTTCCAATTGCTCCAGCAGTTGCTATTCCAAAATTGCTAGCTAAGACTGGTGTCAAGAAAG  
AGGATGTAGCTATGTGGGAAATTAATGAAGCCTTCAGTGTGTAGCTTTGTCCAACATGAAAATGCTA  
GAACTTGACTCTAACAAGATTAACATTCATGGAGGAGCTGTTAGTCTTGGCCATCCCATTGGTATGTCT  
GGTGCCAGAATTGTTGTTCACTTGTGCCATGCTCTCAAGAAGGGCGAAAAGGGTGTAGCTGCTATCTG  
TAACGGTGGAGGTGGTGCCACATCTATCATGATTGAGAAATTGTAA

>Helicoverpa armigera Hydroxymethylglutaryl-coenzyme A synthase

ATGGGCGGAAGAGTTGAAAACGTTGGTATACTCGCCATGGAGTTATACTTCCCTTCACAATACGTAGA  
CCAAACGGAACCTGGAAAAATTTGACGGCGCTTCCACCGGCAAGTACACAGTCGGCCTCGGGCAGCT  
CAAATGGGCTTTTGTCTGACAGGGAAGACATAAACTCTATTTGTATGACAGCTCTGCACAGACTGA  
TCGAGAAAAACAGCATAAATCTTCATGACATTGGCCGGCTAGAGGTTGGTACTGAGACAATCATTGAT  
AAAAGTAAGAGTGTGAAGACCTACCTCATGACCTTGTGTTGCTGAGGAAGGTGCAACTGATATTGAAG  
GTATTGACACAACCAATGCTTGCTATGGAGGTACTGCAGCTCTGTTTAATGCTGTGAACTGGGTGGAG  
TCATCTTCTGGGATGGCAGAAAGGCGATAAGTGGTGGCAGGAGACATTGCAGTGTACGGCAAGGGGC  
CAGCGAGGCCACAGGTGGGGCAGGAGCTGTGGCCGTGCTCATAGGGCCCAATGCTCCCCTGGTACT  
TGACTGTGGTGTCCGTGCTTCATACATGACTCATGCTTATGACTTCTACAAGCCAGACTTGGCATCAGA  
GTTCCCATTGTTGATGGGAAGCTCTCCATTAATGCTACCTCAGTGCTTTAGATAATTGTTACAATTTG  
TATTGTAAGAAGATGAGGAAGATAGATCCTGACTTCAAAGGCTTATTGAGCTTAGATGGTATGTTGTT  
CACTGTCCATACAGTAAACTAGTACAGAAGTCCCTAGCTAGAGTGTGTTTCAACGATTTCCCTCAATGC  
ATCACCAGAGCAAAGAGAAAAACAGTTTCCAGGTTTATCCAACCTTCAGTTCACACAAATTGGAGGAA  
ACATACTTTGATAGAGATGTAGAAAAAGCTTTCATGACATACAGCGAGGCTCTGTTTGAAGAGAAGAC  
CAAGCCATCACTGTATATAGCAAAGAATGTAGGAAACATGTACACACCATCACTGTATGGAGGCCTTG  
CTTCATATCTCATTAGTAAATCTCCTGAGCAGCTGATTGGGAAGAAGTTTGAAGGAGGAGGAGGAGG  
AGGTCTGGCCTCAACTATGTATTCAATAAATTTGCAATGACATGAGTGTGGTTCAAAGTTGGCAAA  
ACTGTTGAGTTCATTGAATGAAACAGTTTCTTTATTAATGAAAGGCAGAGTGTGGAGCCTAGCAAGT  
TCTCGGACATTATGGACATTAGAAGTATGAACTACCACACAGCTCCTTATCAGCCATCGGGATCAATAG  
ACATACTGTTCCCCGGCACGTACTACCTCATTGACATTGATGAACTAAGAAGACGTTTTTATGCAAGGA  
AAGTTTGA

>Helicoverpa armigera Mevalonate kinase

ATGTTGAACGGAATAGATAATTTGTACACAGTAAGTGTGTCGGCTCCTGGGAAAGTGATTCTTCATG  
GGGAGCATTTCGGTTGTGTACGGGAAGACTGCGGTGGCTGTCAGTCTTGGACTCAGGAGCTCTATTGT  
TATTAAGGAAGTAAATTATCACGTGGAGCCAACGATACGGATACATTTGCCATGCGTCGGATTAGAA  
GAAACATTACTTTTTAGAACCTACAGTTAAGAGCTTATTCCACCCGAAGCTAGCTCCAGGGATTACGG  
GCAAATTCTCTTGGAGATTACCTGATAAGCTAGACCATGACAACCATTTGCGAAGGGTCGACGAGTT  
CCTACACATCATTAAAGCCAAACTTCGATGCCCTGCAGAATAACCAGAAGAATTCCTTGCGCAGTTTC  
CTATATGTGTTTTCTGGGATATTCGGGAGCACGAATCTTCCTGTCCGATCAATGGATATTTCTTTAGG  
ATCTGAGTTAACTATTGGAGCTGGTACTGGAAGTTCAGCTTCTTTTGCTGTGTGTTTAGCAGGAGCGT  
TAATCCAGCTCCTCAAATTGAAGAGTTCGACATCGTTCGATGCTTTCTATGATCAGACGAGTGAAGA  
CTTTAGTATGAATGAAAGAGAAATCATATCGGAATGGGCGTATAATTGTGAGAGGATAATGCACGG  
ATCTCCATCAGGTATAGACAACGCAACTTGCACCTTTGGTTCGCTGGCCTCCTTCAAGAAAGGCAGT  
AAGCCCCGGCATCTAGACATCAAGATGGACCTCCGGGTTCTCCTAGTGGACTCCCGCGTGTCCCGGG  
AGACTCGCGCCCTTGTGCTGAAGGTAGCAGCACTGAGGCAGAGGAACACAGCTGCAGTCGACCATA  
TCCTAGACGCTTGTGATCATGTCCCCTCACCCAGCCACCCAGTTTTGGAAAACTCTCCAGTGG  
CAAGTGTGAGATTGATAGTGAAGCGGAGTATCAGCATTTAGCAGAGCTGTGGGACATGAACCACTG  
TCTGCTCTCGGCGCTGGGCGTGTGACACCCCGCTCTAGAAGCAATTCGCAGCGCCGCCCGCGCTAAA  
GGACTAGCTTGTAACCTTACCGGCGCCGGTGGTGGGGTTACGCCATGGTGCTAATCCCGCCGACGA  
CGCCGCGGTCCATAGTAGACTCTCTATGCGGGCAACTGCTCGAAAACGGCTTCCGAGTGAAGGAGA  
CACGCCTGGGCGGCCCGCGTCTCCATCGAGATGTGA

>Helicoverpa armigera Phosphomevalonate kinase

ATGCCTCAAATAATATTGCTATTCAGCGGTAAGAGAAAAATCTGGGAAGGACTTTTTAACAACACATTTA  
CAGAAATTGCTAGGTGACAAATGCGAAGTGTTAAAAATATCTCAGCCGATAAAGAGTCACTGGGCAA  
AGGAGAAAAATTTGAATCTGAATGAGCTGTTGGGTGACGGAGAGTACAAGGAACAATACCGCCTAGA  
TATGATCAACTGGAGTGACGAGATGAGATTACAAGATTATGGTTATTTCTGTAGGATCGCTTGTGAGGA  
TGCTACAGAGAAGCCAATTTGGATTGTGAGTGATATCAGAAGAAAAACAGACATACGCTGGTTCAAA  
GAAAAATATGGGGATCAAATTAGGACTATTAGGATAGTAGCAGATGAAGATACGAGAAAGAAAAGAG  
GTTTTAGTTTTAAATCTGGAGTTGACGATGTTGCTTCTGAGTGTAACCTAGATGATTATACTGACTGGG  
ATCTGGTTATAGACAATAGTGAAGGAAAACAGGAGGTGGAAGAACAAATTGAGTAGTATATTGGGATTG  
CTGTCTGGTTTTATGA

>Helicoverpa armigera Diphosphomevalonate decarboxylase

ATGAGTGATATTATAACAGTGATAGCACCGGTTAACATAGCTGTAATAAAATATTGGGGCAAAGGGAC  
GAAGATTTAATATTACCGTTAAATGATTCCGTTAGTGCTACTTTAGACACGAGTATTATGTGCGCAAAG  
ACATCAGTTTTCGCAAGAGCAGATTTTAAAGAAGATGCAATATGGTTGAATGGGAAGAAGGAATCTTT  
TGATAGCCCAGACTGCAAACTGTCTTGGAGAAATTAAGTTGCGAGCTGCCGCTGAAAAAAGTGTT  
AGTGAAGATTTCTTACAGAGGAAAGTTCATGTGTGTTCTGAAAATAATTTCCCTACTGCAGCTGGGTT  
AGCGTCGTCTGCTGCTGGCTATGCCTGTCTCGTACTGCCCTGGCGAACTTTACAAGGTAAAGTCTG  
ATGTCAGTTCAATTGCTAGGCTGGGCTCAGGCAGTGCTTGTAGGAGTGATACGGTGGCTTCGTCAGA  
TGGCACGCAGGCATCAACCCAAATGGAACAGATTCTGTAGCAACTCAAATTGTTGACTCTACACACTG  
GCCTGAAATGCATGCCCTCATACTAGTTGTCGGTGACACTAAAAGAAAAGTCTTCTACAGTTGGCA  
TGAGAATAGCTACTCAAACCTCCGAACTATTAACATAGGGTAAAGTATTGTGTGCCGGAGAGAACT  
GAGGAGATCATAAGGCAATAAGGCAGAAAGATTTCCCAAAGTTTGCAGAAATTACTATGAAGGACA  
GCAATCAGTTCCACGCAGTCGCTTTAGATTCTATCCTCCATGCGTGTACATGACTGATGTATCTCATT  
CATTGTTGATTTAATTCATAAGTACAATACTGCCTCTGGAAGTGAAAAGTGGCGTACACATTTGATGC  
CGGACCAAATGCTTGTGCTGTACCTACTTAAAGATGAGGTACCCAAAGTAATATCTTTGATAAAGCATGT

CTTTCCTACATCAAAGCCAGAAAGCTTTATAACTGGCCTAAGTAGTGGTGAAGAGGTTTTAAGTCCAG  
CATTGATGAGTATTTCTGAACCTCAGGTTTCAAGATTTGATCAAATATGTGATTCACACAAAAGTAGGTG  
AAGGGCCTACAGAAATAACTGATGGGTACATCTCTTGAATGAGGCTGGATTACCAAAGACTGAATAG  
>Helicoverpa armigera isopenenyl-diphosphate delta isomerase 1

ATGCTTGTTCGGAGACTTACAAGATCCTTATGGAACACGGTGAGAGTGGAAAAGAGGTTTTCTAGCCTC  
TGAACCGCTGAAACCACAGACTGAAGAAAAAGATAGCGTTGACCCAGTACAGTTGGAGGCTCTCGAT  
AAAGACATATGTCTGTTAGTTGATGAGAAGGACAACCTTCGTGGGAACAGCCACCAAAGAGAATGCC  
ATAAAGTAGGAGATGATGGTGAAGTACTGCTCCACCGTGCCTTCAGTGTGTTTTCTCTTCAACAAGAGA  
GGAGATATGCTCATGCAGAGAAGGTCCAGCCAAAAAGTAACATACCCAGACTACTACACAAACGCGT  
GTTGCAGTACCCCGCTATACATAGATGAGAAAGCCGAAGATGTTGTCACAGCAGCTAGACGCAGGCT  
CAATTTGGAGTTAGGAATTCCTTTAGACCAGATGGACCCAGAGTTGTTACAGTTCATGACGCGCGTGC  
ACTACCACGACCCCGCGACGGCGTGTGGGGAGAGCACGAGATCGACCACATCCTATTCTTCCAAGC  
AGACGTCAAGGTCAAGCCGAACCTCAACGAGATATCTGAGTATTGCTTCGTACCTAAAGCTGAATTTA  
ATGCGTTTTATCCCAACTCTGGAAGGTCCACTAACGCCATGGTTCAACATGATTGCGCCGACCCGACTC  
AAGCTATGGTGGGACAACCTTCATCGTCTCAAGGAATTGGCAGAACCTGACAAGATACAGAAGTTTAT  
GAGTGATAAAAAATAA

>Helicoverpa armigera Farnesyl pyrophosphate synthase 1

ATGGCCCTTTTGTCTCCGTAAAACATTATTTTTCAACCAAATTAGGGCATTGCATAAAAAAGCGGTAA  
TTAAGTACACCAATAACTTTCAAATCGGGTGAAAATTTAAGAAATTTGATGCAGTTCGGCCCGAAGT  
GATGAAATCCTTAATGTCTAGTCCTAAGTTCACGAAACAATTGCCTGAAGTTGGTACCAGGATTAAG  
AGATGTTAGATTACACAATGCACGGAGGAAAACGTAGCGTCCGATTATCTGTTCCCTTCGGCTATCAG  
ATAATGGAAAATCCAAAGTACTTCGTAGAGGAAAACTGCACACAGCACGATTTCTAGGATGGTGCTT  
AGAAATTTTACAGGCAAACCTACTGACTATAGACGATATATTGGACGCAAACACGACTCGCCGTGGCC  
TGACTTGCTGGTACCTGCGACCAGAAGTCCGGTACTTCGGCGACTAACGACAGCATGCTCATATATCTAT  
GTCTGATGGAAGTCCTGCAAATTAACCTTCGAGAAAGAACCTTATTATGTGGATTTGATTAAGATTATTC  
ACGATACAGCCATGTACACAGGAATAGGACAATATTTAGAGTACTCATCAAGTTACAGTAAGGAAAA  
AATAATTTGGAAGTATTCAACATGGACCGATTCAATACCATCGTTATACAAAAGGTGCCTATTCCTTCT  
TCACAATGCCCTTTCTCGTATCTCTGCTTTTAGTGAAGAACGGAAAAGAAAGAGATCTTACAGAGCAC  
ATCGACATCTGCTTTGAAGTTGGTAACTTCTACAATATCAGAACGACTTCAAAGACGTCTACTGGGA  
CAAGGCTACCTATGGAAGATGGCACAGATATCAAGAAGGTAAACTCTCCTGGATTGCCATAACAG  
CGCTGGAGCGCTGCAACGAAGCGCAACGTTCTCTTTTCAAAGAATACTACGGCAGCAGAGACCTGA  
ACATGTTAAGCAAATCAAGCAGCTTTATGGTGAATTGCAAATGGATAAAGTGTACGCTGAGTTCGAAC  
ATTCTTTTTATGAAAATATGAAACGGCGAATTCATACTTTGCCAACTGAAGGAGAGATACAATACTTTT  
TGCAAATATTAGAGGTGTGCCGACAGAGAGCTTATTAA

>Helicoverpa armigera Farnesyl pyrophosphate synthase 2

ATGAATATTTGTAGAAAATTGACCAACTCCAGCTTGCCTGCTGTTGGGAAAAGGATTGCCAATGTTAC  
GGCAAAGGATTTTTTTGACAGTACCTTTCAGAGACTTTATAGTTCCACTAATTCGAAGTTTGATTTGAA  
TAAGGAAAGGGTGGAGTTCATAATGCTCTGCCAGGAGTTATCGATATCCTTGCTAAGCATAAAAAGT  
TTCAAGAAATGCCAGAAGCTGATAAATGGATGAGAAATGTCCTTAACGGCAATATAATTGGCGGTAAA  
AACATGAGGGGTTTAAACGACGGTAATGTCTTACAAAATGATTGAAAAACCAGAGAACATAACGGAGG  
AGACCTTAAGATTGGCCAGGACTTTGGGATGGTGCCTGAAATTTTGCAAGCATACTGCCTCGTGTTA  
GACGATATCGCGACGGCTCCATCACTCGCCGAGGCATGCCTTGCTGGTATAGACGAGAAGACGTCG  
GCATAGCAAATGCAGTCAACGACGCCACGCTCATCCACTATTGTCTACTGCAGATATTGCGAGCGAAC  
TTCGAGAAATCACCTAATTATGTTAATTACTTTTATAATTTCAACGAGACGCTCTTTTACACAAGTCTCG



GACAATATTTGGATATTATGACAGGGCTAACTAAAAAGAACTACAGTTTATTTACTATGGAACACTACG  
ATGCTATAGTCAAACATAAATCAGCCTACTATACGTACAAGCTGCCCATATCTCTGGGATTCATGTTGGC  
TAACAGGTATAACGAAGAACTCATAAAGATGTGGATGATATTTCTATGAAATTGGGGAGACTTTTTCA  
AATGCAGGACGATTATATCGACTGTTACGGAGATGAAAATATGACCGGGAAAATGGGAAGCGATATCC  
AAGAAGGAAAATGTTTCATGGTTAGCAGTAAAAGCCCTTCAACACTGCAAGCCTAATCATCGCGCAGT  
ATTACGGTTTTGTTACGGAAGTAAAGAGCCGGCACACATAGAACGAATCAAGGTACTTTACAACCAG  
CTCAAGATTCCGCAGCTTTACAAAGATGAAGAAAATGAAATCTACAACAAGATTGTTCAAAGAATACA  
AGATGTATCTTCAGAATCAGAACGAGAATTGTTCCCTACAAGTCTTGCATGATACTTATGGGAGAAAAC  
ATTAG

>Helicoverpa armigera Farnesyl pyrophosphate synthase 3

ATGAATAACATAAAAATTCCTTCGGTTTTATGAGTAGAACACGGACGTTATGTGGCGGCTACAACAAACA  
TCCGGGATTTCTTCAACAGTCTTTGAAGAGACATATGCAGACAAGTGTGTCAATATCTCAAATAATGA  
AGGAAAAGAGATTTTTACGATGCACTGCCAGGTATCATAGACAACCTGCAGGCTAGTTCCAAGATA  
TCACAACCTCCCTGAAGTGGGCAACTGGGTCAGGAAGGTGCTTGAACACAATTTGACTGGTGGCAAAC  
ATTCAAGAGGTATAATCACAATGCTATCATATGAGATGTTAGAAACACCTGAAAAAGTTACTGATGAGA  
AACTCAAGCTGGCCAGGGTCTGGGATGGTGTGTAGAAATGCTACAAGCCTACTTCATAGTAGTAGAC  
GATATAATGGACAGATCGACAACACGTCGAGGCATGCCATGCTGGTACCGGATGCCGAACGTTGGTCT  
AGGCGCTTTAAACGACTCCATACTCATACTTGTGCGATTATGGAAACGCTACAGACGTACTTTGGTAA  
CACGGAACATTATGTAGATGTTGTTGACTTTTTAATGAGGCACTACTCTACACCTCAATGGGACAACA  
CTTGGACTTCACGACAGCCCACCATAAAAAAGACTACAGTCTATTCACAATAGACCGTTACGAGTCTA  
TTGTGAAGTACAAGACTAGTTGCTATACCTTCAGGTTACCCGTTCTATTAGGGCTGGTACAGGTTCAAG  
ATGTCGATAAGAGAATGTATAACGATGTTGATGATATCTGCTACAAGCTGGGCAGACTATTTCAAATGC  
AGGACGATTACATAGACTGTTACGGCGACGAATCAGTCACCGGCAAAGCAGGTACCGACATCCAGGA  
AGGTAAGTGCTCCTGGTTAGCTGTCACCGCTTTAAAGCGCTGCAACGATACTCAAAGGGAACCTTTCA  
CAAACAACACTACGGTAGCGATAAACCAGAACACGTCGACATTATCAAGCGGCTTTACGGTGATTTGAGG  
CTACCAGAGATTTACCTACAAGAAGAGACTGAACTACATAATGATATTACTTCGAAAGTGAGAGCGTT  
GCCCTCTGAAACCGCTCCTACGTTCTTCTTTAAGCTTATAGACAGGATTTATAAGAGGAAACATTA

>Helicoverpa armigera Farnesyl pyrophosphate synthase 4

ATGTTCTCCACGAAGAAAAGTTTTGGATAGGATCCTACAGATCTACAAGAAAGAGATGCGTCGGCAAAT  
CAGCAAGACCACCAGTGTCCAACTCTGACGCCATGGTGCCAAGGTTGGACCAGGCATCCACCAAG  
TCACCTCAGAACGACGAAGCTGGTCCCAAGAAGCTTTTGAACTGCAAAAATATCACAGATACCTGT  
CGACCCTGACAACGCAGGAAATGCCGATGGCTACCCGAGGACTGGCCGTGTGCAAGGACCAGTCCC  
GGGAGTTTCATGGCTTGCTTTCCGGACATCGTGAGGGACCTCACTGAGACTGGCAAGCACATTGATGT  
GCCAGAAGCCAGCAAGTGGTTGGCTAAGCTGTTACAATACAACGTGCCGAACGGTAAAAAGAATCGA  
GGTCTAGCGACAGTGCTGGCTTACAAAATGCTGGAAAAGAAAGAAAACCTTGACGCCTGAGAATATTC  
ACTTGGCCAATATGATGGGCTGGTGCCTGAAATGTTCCACACTCACCAGTTACTGCAGAATGACATC  
GTAGAAGGCACAGAGATGCGTCCGCGGCCCCCTGCTGGTACAAGCACCCAGAAGTCGGTCTCACTG  
GCATCAGCGATGCAGCTCTCGTCCAGGCCGCCATGTTCTCAACCCTCAAACGTCACTTCAACAACAA  
ATCGTACTACAGAACCGTCCTTGAACATTCAATGAGATGCTGTTGAAATGCTCGATCGGCCACTTCC  
TAGAAAATCAGATGGCTAAGACGGATAAGCCTGACCTTACCCTGTTACAATGGAGAAGTACGAAGC  
CATCACGAAGTACAAGACTTCATACCACACGTTCCAGATGCCAGTCACCCTGGCTCTGCTCATGACAG  
GCGTAGAGGACCCCGAAACCCATAGACAAGCCAAAACAATCCTCCTTAAGATGGGCGAATTCTTCCA  
AATTCAAGATGACTTCTTAGATTGCTTCGGAGATCCAGCAGTCACAGGCAAGAACGGCACTGACATTC  
AAGATGGCAAATGCACTTGGCTCGCAGTTGTCGCCTTACAGAGGGCAACACCGAAGCAGAGGCAATT

CATGGAAGAGAACTATGGCAGCTCAGACCCTGAAGCAGTCGCCAAGATCAGGCACTTGTACGAGGA  
ACTGCAGCTGCCTCACACATACTCTGTCTTCGAAGACGCTACTTACGATCTCCTTAGGACTCAAATCC  
AGCAAGTCACAAGAGGCCTGCCCCACGAACTGTTCTTCAAATCTTAGACAACATCTTCAGGCGAAG  
CGTCTAA
